# Supplementary material for: A Cross-Diagnostic Investigation of the Differential Impact of Discrimination on Clinical and Personal Recovery
Source: Atypon-hosted journal article supplement (doi:10.1176/appi.ps.201500339), 2016-11-15
Supplement: appi.ps.201500339.ds001.pdf [file appi.ps.201500339.ds001.pdf]

## CROSS-DIAGNOSTIC INVESTIGATION1

## Online appendix

## Sample items of the measures

| Variable                                                   | Scale                                                                                                     | Response category                                                              | Sample item                                                                                             |
|------------------------------------------------------------|-----------------------------------------------------------------------------------------------------------|--------------------------------------------------------------------------------|---------------------------------------------------------------------------------------------------------|
| 1. Perceived discrimination from the general public        | Discrimination subscale of the Stigma Scale (1, 2)                                                        | Five-point Likert scale from 1 (strongly disagree) to 5 (strongly agree)       | I have been discriminated against in education because of my mental health problems.                    |
| 2. Perceived discrimination from health care professionals | Adapted from the discrimination experience subscale of the Internalized Stigma of Mental Health scale (3) | Five-point Likert scale from 1 (never) to 5 (always)                           | Health care professionals often patronize me, or treat me like a child because I have a mental illness. |
| 3. Self-Stigma                                             | Self-Stigma Scale (4)                                                                                     | Four-point Likert scale from 1 (strongly disagree) to 4 (strongly agree)       | My identity as a person with mental illness is a burden to me.                                          |
| 4. Mental health service engagement                        | Adapted from the Service Engagement Scale (5, 6)                                                          | Four-point Likert scale from 1 (not at all or rarely) to 4 (most of the time)  | I take an active part in the setting of goals or treatment plans.                                       |
| 5. Recovery orientation of services                        | Recovery Self Assessment-Revised (RSA-R) – Person in Recovery version (7, 8)                              | Five-point Likert scale from 1 (strongly disagree) to 5 (strongly agree)       | Staff listen to me and respect my decisions about my treatment and care.                                |
| 6. Clinical recovery                                       | Behavior and Symptom Identification Scale (9)                                                             | Five-point Likert scale from 1 (no difficulty / none of the time / never) to 5 | During the past week, how much of the time did you feel sad or depressed?                               |

## CROSS-DIAGNOSTIC INVESTIGATION2

---

(extreme difficulty / all of the time /  
always)

|                      |                                         |                                                                                  |                                                      |
|----------------------|-----------------------------------------|----------------------------------------------------------------------------------|------------------------------------------------------|
| 7. Personal recovery | Recovery Assessment Scale (10, 11)      | Five-point Likert scale from 1 (strongly disagree) to 5 (strongly agree)         | I have goals in life that I want to reach.           |
|                      | Recovery Markers Questionnaire (12, 13) | Five-point Likert scale from 1 (strongly disagree) to 5 (strongly agree)         | I am involved in meaningful productive activities.   |
|                      | Test Life Satisfaction Scale (14, 15)   | Five-point Likert scale from 1 (strongly dissatisfied) to 5 (strongly satisfied) | How satisfied are you with your current social life? |

---

## CROSS-DIAGNOSTIC INVESTIGATION3

### **Details of data analysis**

A two-step approach to structural equation modeling (SEM) was conducted using Mplus version 5.1 (16). First, the hypothesized latent factor structure was examined with confirmatory factor analysis (CFA). In the CFA, items from scales measuring perceived discrimination from the general public, self-stigma, mental health service engagement, and recovery orientation of services were grouped into three observed parcels to represent the underlying constructs (17). The four items measuring perceived discrimination from health care professionals were used as the indicators of the construct. The six subscales of the BASIS-24 served as the individual indicators of clinical recovery. RAS, RMQ, and TLSS served as the individual indicators of personal recovery. Upon confirmation of the latent factor structure, SEM was performed to examine the hypothesized relationships in the proposed model. The overall model fit was assessed by a combination of fit indices including chi-square ( $\chi^2$ ) statistics, comparative fit index (CFI), Tucker–Lewis index (TLI), and the root mean square error of approximation (RMSEA). CFI and TLI with values between .90 and .95 indicate an acceptable model fit, while values greater than .95 indicate a good model fit (18). A RMSEA value of .06 or less indicates a close model fit, while a value between .06 and .08 suggests a reasonable model fit (18). In addition, a multi-sample SEM was conducted to examine whether the hypothesized relationships would hold across people with different mental illnesses. Invariance analysis suggested by Byrne (19) was performed to examine the

## CROSS-DIAGNOSTIC INVESTIGATION<sup>4</sup>

measurement and structural equivalence across the three groups of people with different psychiatric diagnoses. Configural invariance was first established, followed by testing the invariance of factor loadings and structural parameters, to investigate whether and how the experience of discrimination would differentially affect recovery across groups. A likelihood ratio test was conducted for model comparison in invariant analysis. Mediation effects were tested with the bootstrapping procedures recommended by Shrout and Bolger (20). Bias-corrected bootstrap confidence intervals were estimated using 1,000 bootstrapped samples from the original data (21).

### **Description of multi-sample SEM results**

The results of the multi-sample SEM supported the hypothesized relationships among the latent variables across people with psychotic disorders, mood disorders, and substance use disorders. Specifically, perceived discrimination from the general public and perceived discrimination from healthcare professionals were positively associated with self-stigma and negatively associated with service engagement. Self-stigma was, in turn, negatively correlated with clinical recovery and personal recovery, whereas service engagement, in turn, was positively correlated with clinical recovery and personal recovery. Recovery orientation of services was positively associated with service engagement and personal recovery.

The overall model explained 23.7%, 24.6% and 24.2% of the variances in self-stigma, as well as 23.2%, 30.1% and 18.8% of the variances in service engagement among participants

## CROSS-DIAGNOSTIC INVESTIGATION<sup>5</sup>

with psychotic disorders, mood disorders, and substance use disorders, respectively. It accounted for 39.3%, 36.9% and 34.4% of the variances in clinical recovery, as well as 40.1%, 32.4% and 35.6% of the variances in personal recovery among participants with psychotic disorders, mood disorders, and substance use disorders, respectively.

### References

1. King M, Dinos S, Shaw J, et al.: The stigma scale: Development of a standardised measure of the stigma of mental illness. *The British Journal of Psychiatry* 190:248-54, 2007
2. Brohan E, Slade M, Clement S, et al.: Experiences of mental illness stigma, prejudice and discrimination: a review of measures. *BMC Health Services Research* 10:1-11, 2010
3. Ritsher JB, Otilingam PG, Grajales M: Internalized stigma of mental illness: Psychometric properties of a new measure. *Psychiatry research* 121:31-49, 2003
4. Mak WW, Cheung RY: Self-stigma among concealable minorities in Hong Kong: Conceptualization and unified measurement. *American Journal of Orthopsychiatry* 80:267-81, 2010
5. Tait L, Birchwood M, Trower P: A new scale (SES) to measure engagement with community mental health services. *Journal of Mental Health* 11:191-8, 2002
6. Clement S, Williams P, Farrelly S, et al.: Mental health-related discrimination as a predictor of low engagement with mental health services. *Psychiatric Services* 66:171-6, 2015

## CROSS-DIAGNOSTIC INVESTIGATION<sup>6</sup>

7. O'Connell M, Tondora J, Croog G, et al.: From rhetoric to routine: assessing perceptions of recovery-oriented practices in a state mental health and addiction system. *Psychiatric rehabilitation journal* 28:378-86, 2005
8. Ye S, Pan J-Y, Wong DFK, et al.: Cross-validation of mental health recovery measures in a Hong Kong Chinese sample. *Research on Social Work Practice* 23:311-25, 2013
9. Eisen SV, Normand S-L, Belanger AJ, et al.: The revised Behavior and Symptom Identification Scale (BASIS-R): Reliability and validity. *Medical care* 42:1230-41, 2004
10. Giffort D, Schmook A, Woody C, et al.: Construction of a scale to measure consumer recovery. Springfield, IL: Illinois Department of Health and Human Services, Office of Mental Health, 1995
11. Mak WW, Chan RC, Yau SS: Validation of the Recovery Assessment Scale for Chinese in recovery of mental illness in Hong Kong. *Quality of Life Research* 25:1303-11, 2016
12. Ridgway P, Press A: Assessing the recovery-orientation of your mental health program: A user's guide for the Recovery-Enhancing Environment Scale (REE). Lawrence, Kansas: University of Kansas, School of Social Welfare, Office of Mental Health Training and Research, 2004
13. Mak WWS, Chan RCH, Pang IHY, et al.: Effectiveness of Wellness Recovery Action Planning (WRAP®) for Chinese in Hong Kong. *American Journal of Psychiatric Rehabilitation*, in press

## CROSS-DIAGNOSTIC INVESTIGATION<sup>7</sup>

14. Test MA, Greenberg JS, Long JD, et al.: Construct validity of a measure of subjective satisfaction with life of adults with serious mental illness. *Psychiatric Services* 56:292-300, 2005
15. Chan KK, Mak WW: The mediating role of self-stigma and unmet needs on the recovery of people with schizophrenia living in the community. *Quality of Life Research* 23:2559-68, 2014
16. Anderson JC, Gerbing DW: Structural equation modeling in practice: A review and recommended two-step approach. *Psychological bulletin* 103:411-23, 1988
17. Russell DW, Kahn JH, Spoth R, et al.: Analyzing data from experimental studies: A latent variable structural equation modeling approach. *Journal of Counseling Psychology* 45:18-29, 1998
18. Hu Lt, Bentler PM: Cutoff criteria for fit indexes in covariance structure analysis: Conventional criteria versus new alternatives. *Structural equation modeling: a multidisciplinary journal* 6:1-55, 1999
19. Byrne BM: *Structural equation modeling with Mplus: Basic concepts, applications, and programming*. New York: Taylor & Francis Group, 2012
20. Shrout PE, Bolger N: Mediation in experimental and nonexperimental studies: new procedures and recommendations. *Psychological Methods* 7:422, 2002

## CROSS-DIAGNOSTIC INVESTIGATION8

21. Cheung GW, Lau RS: Testing mediation and suppression effects of latent variables:

Bootstrapping with structural equation models. *Organizational Research Methods* 11:296-

325, 2007
